# Supplementary material for: Detecting gas molecules via atomic magnetization
Source: Royal Society of Chemistry journal article supplement (doi:10.1039/c4dt01401d), 2014-01-01
Supplement: c4dt01401d1.pdf [file c4dt01401d1.pdf]

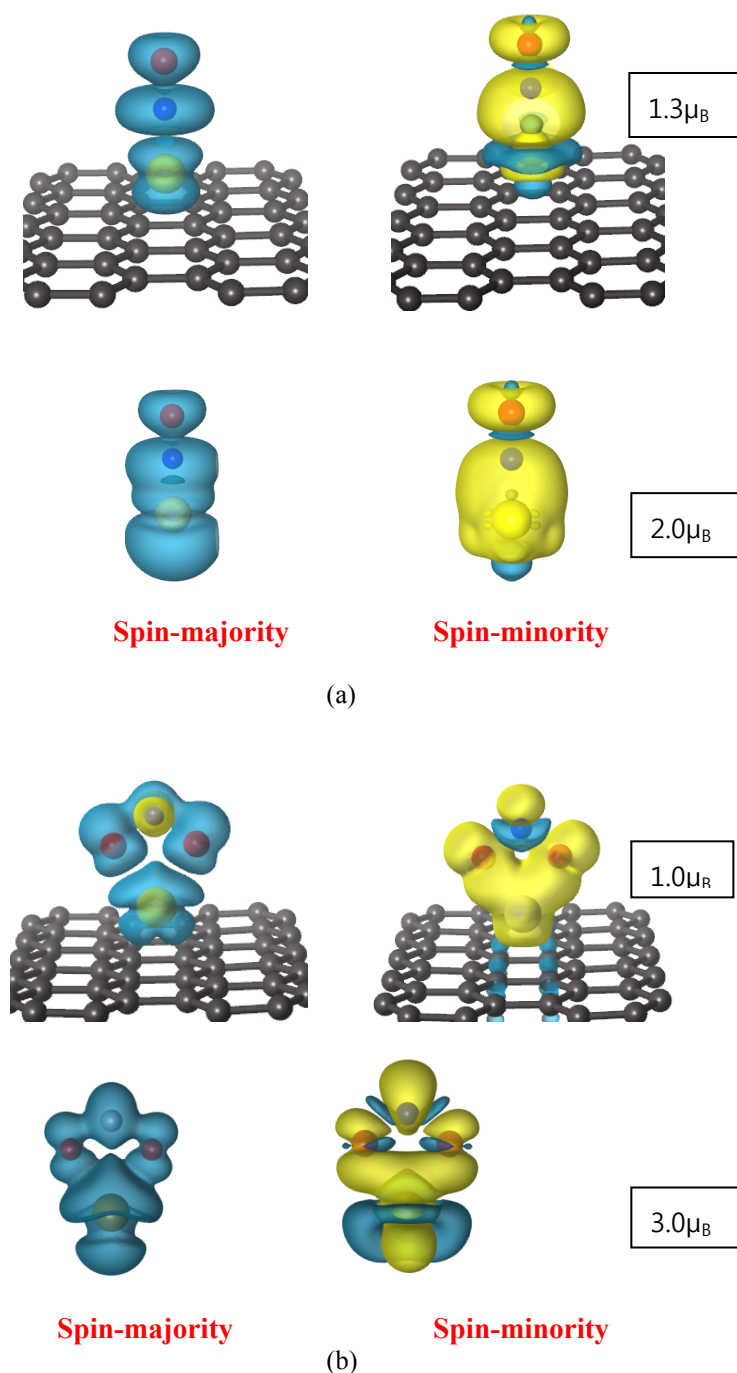

S1. Charge transfers at Fe@G and Fe by the adsorptions of (a) NO and (b) NO<sub>2</sub>. The blue and yellow surfaces present the charge depletions and accumulations with  $-0.002$  and  $0.002$   $e/\text{\AA}^3$  iso-values, respectively. The charge transfer aspects, depletions of spin-majority charge from Fe and Fe@G are similar with those of Co and Co@G.
